# Supplementary material
Source: HighWire-hosted journal article supplement (https://ez-admanager.com/highwire/filestream/136439/field_highwire_adjunct_files/0/charidimou.pdf)
Supplement: charidimou.pdf [file charidimou.pdf]

# Terapia con estatinas en el accidente cerebrovascular isquémico

¿Es tiempo de ensayos aleatorizados de gran tamaño?

Andreas Charidimou,  
MD, MSc (Neurol),  
PhD  
Áine Merwick, MB, MSc  
(Stroke), PhD

Correspondencia al  
Dr. Charidimou:  
andreas.charidimou.09@ucl.ac.uk

*Neurology*® 2016;86:1082-1083

A pesar de las mejoras en la mortalidad del accidente cerebrovascular, junto con los avances terapéuticos, los pacientes con infarto cerebral frecuentemente enfrentan una perspectiva de discapacidad sustancial. Claramente se necesitan estrategias novedosas para mejorar los resultados en el infarto cerebral. Estas podrían incluir nuevas indicaciones de drogas previamente aprobadas como efectivas y seguras en procesos relacionados con la enfermedad,<sup>1</sup> como las estatinas. Al contrario de la fuerte evidencia que hay apoyando el uso de estatinas en la reducción del riesgo cardiovascular e isquemia aguda del miocardio, sus efectos en el tejido cerebral y beneficios potenciales en la evolución del infarto cerebral no se conocen bien y están poco estudiados. La única indicación actual específica de estatinas en el accidente cerebrovascular es el uso de atorvastatina como prevención secundaria.<sup>2</sup> Recientes meta-análisis encontraron una asociación entre el uso de estatinas preinfarto y un buen resultado funcional (*odds ratio* [OR] agrupados: 1,50; intervalo de confianza [IC] del 95%:1,29-1,75;  $p < 0,001$ ),<sup>3</sup> y menor mortalidad (OR agrupados: 0,42; IC 95%: 0,21-0,82;  $p = 0,0108$ ),<sup>3-5</sup> incluso en pacientes con infarto cerebral agudo tratados con trombólisis EV.<sup>3</sup> Sin embargo, estos números estimados derivan de cohortes observacionales relativamente pequeñas con riesgo de sesgos.

En este número de *Neurology*®, Tsivgoulis et al.<sup>6</sup> reportan importantes datos nuevos en el tema, sumando a la creciente evidencia de un efecto beneficioso de las estatinas en el accidente cerebrovascular isquémico agudo. El estudio investigó el rol del pretratamiento con estatinas en las medidas de resultado a corto plazo en 516 pacientes consecutivos con infarto cerebral isquémico agudo debido a una aterosclerosis de grandes arterias (por criterios TOAST [*Trial of Org 10172 in Acute Stroke Treatment*]). Los autores utilizaron un diseño prospectivo multicéntrico y reportaron que el uso de estatinas antes del infarto cerebral estuvo independientemente asociado con un resultado funcional favorable (puntaje en la escala de Rankin modificada 0-1; OR: 2,44; IC 95%: 1,07-5,53), menor riesgo de mortalidad al mes (HR: 0,24; IC 95% 0,08-0,75), y menor recurrencia de infarto (HR: 0,11; IC 95% 0,02-0,46) en un número de análisis ajustados.<sup>6</sup> Otros estudios más pequeños de pacien-

tes con infarto cerebral y AIT con enfermedad de grandes vasos en la fase hiperaguda y antes de la revascularización carotídea no han encontrado una asociación con el pretratamiento con estatinas y la recurrencia de infarto cerebral a las 72 horas.<sup>7,8</sup> Por lo tanto, el trabajo de Tsivgoulis et al.<sup>6</sup> aporta datos clave sobre los resultados funcionales y tardíos, lo que sugiere un efecto protector.

A pesar del enfoque riguroso del diseño y del análisis estadístico de este estudio (ej., incluyendo el pareamiento por puntaje de propensión), los resultados deben ser interpretados con cautela debido a los confundidores residuales potenciales. La evaluación de una hipótesis pre especificada, específicamente en una población de infarto cerebral con presunta aterosclerosis de grandes vasos, es tanto un punto fuerte como una limitación para la generalización de estos hallazgos. Primero, la hipótesis del estudio presupone que el beneficio potencial del pretratamiento con estatinas podría ser mayor en el accidente cerebrovascular isquémico debido a aterosclerosis de grandes vasos *vs* otros subtipos de infarto cerebral. Sin embargo, los tamaños de los efectos relativos no fueron comparados con otros tipos de infarto cerebral isquémico. De hecho, en un meta-análisis de subtipos individuales de TOAST, el efecto del uso de estatinas sobre el resultado funcional pareció ser mayor para infartos cerebrales de pequeño vaso en comparación con otros subtipos (OR: 1,97; IC 95% 1,02-3,8; Breslow-Day valor  $p = 0,008$ ).<sup>9</sup> Esto también podría tener implicancias para los mecanismos subyacentes. Las estatinas pueden tener efectos pleiotrópicos, incluyendo la mejora de la disfunción cerebral de la microvascularización y la mejoría en los resultados post accidente cerebrovascular previniendo la progresión del tejido isquémico salvable del infarto irreversible - posibilidades elegantemente discutidas en el reporte actual.<sup>6</sup> Los pacientes con accidente cerebrovascular con enfermedad de pequeño vaso extensa, ej., capturado por la severidad de la leucoaraiosis, una variable no analizada en el estudio, podría derivar en un beneficio incluso mayor. Más aún, la definición de aterosclerosis de grandes arterias podría haber llevado a alguna mala clasificación, dado que más del 20% de la muestra tenía fibrilación auricular,<sup>6</sup> una fuente mayor de cardioembolismo.

Ver pág 23

Del J. Philip Kistler Stroke Research Center (A.C.), Department of Neurology, Massachusetts General Hospital Stroke Research Center, Harvard Medical School, Boston, MA; UCL Institute of Neurology (A.C.), Queen Square, London; y Chelsea and Westminster NHS Foundation Trust (Á.M.), London, UK.

Ir a [Neurology.org](http://Neurology.org) para declaraciones de intereses completas. La información sobre fondos y aquellas declaraciones relevantes para los autores, si existiesen, se encuentran al final del artículo.

Finalmente, las asociaciones reportadas y los resultados clínicos del presente estudio podrían reflejar las diferencias en el tiempo que pasó desde que el paciente fue visto asintomático (ej., < 12 horas o > 12 horas), la ventana de intervención, retrasos en el tratamiento agudo, tiempos de endarterectomía carotídea e iniciación de estatinas al alta. Debe notarse que no a todos los pacientes con estenosis carotídea se les realiza revascularización, y que los tratamientos médicos usados mientras se espera la revascularización y el post procedimiento siguen siendo un tema importante.

Sin embargo, el reporte de Tsvigoulis et al.<sup>6</sup> aporta una base importante para investigaciones futuras involucrando intervenciones sobre la base de estatinas para la prevención y la terapia del infarto cerebral, incluyendo pacientes sintomáticos con aterosclerosis de grandes arterias. El diseño observacional de este estudio limita la habilidad de hacer recomendaciones basadas en evidencia sobre la iniciación de estatinas, apurando la necesidad urgente de un ensayo clínico grande aleatorizado del tratamiento con altas dosis de estatinas en el accidente cerebrovascular agudo. Las comparaciones aleatorizadas deberían explorar los efectos de la selección de una droga específica de acuerdo con la clase, dosis y tiempo de administración en el infarto cerebral agudo, en diferentes subtipos y sobre los resultados. Si los efectos beneficiosos de las estatinas son a través de la alteración de la grasa tisular cerebral, protección vascular o alguna otra vía biológica (como la inflamación), necesitan más investigación.<sup>7,10</sup> La incorporación de protocolos avanzados de neuroimagen y resultados clínicos en tal estudio podría elucidar más aún los mecanismos potenciales e identificar subgrupos de pacientes con más posibilidades de beneficiarse con la intervención. Los efectos del tratamiento con estatinas también deberían ser investigados en la era de las terapias endovasculares para pacientes con accidente cerebrovascular agudo elegibles con una oclusión de vaso grande (terapia intra-arterial o trombectomía mecánica), que rápidamente se están convirtiendo en un estándar de tratamiento.

Estudios previos han demostrado que el pretratamiento con estatinas puede mejorar los resultados post operatorios de pacientes sintomáticos y asintomáticos luego de una endarterectomía carotídea y los resultados periprocedurales y post procedurales de pacientes con procedimientos de *stenting* de la arteria carótida. El efecto beneficioso demost-

trado en el estudio actual<sup>6</sup> ocurrió en el contexto del tratamiento iniciado antes del inicio del infarto cerebral; aun así, los datos de este estudio tienen implicancias para la interpretación de estudios en desarrollo de enfermedad carotídea sintomática y asintomática, ej., *The European Carotid Surgery Trial 2* (ver <http://s489637516.websitehome.co.uk/ECST2/index2.htm>) y manejo de la enfermedad carotídea asintomática.

## FONDOS PARA EL ESTUDIO

No se reportan fondos.

## DECLARACIÓN DE INTERESES

Los autores no tienen nada para declarar relevante al manuscrito. Ir a [Neurology.org](http://Neurology.org) para declaraciones completas.

## BIBLIOGRAFÍA

1. Collins FS. Mining for therapeutic gold. *Nat Rev Drug Discov* 2011;10:397.
2. Adams RJ, Albers G, Alberts MJ, et al. Update to the AHA/ASA recommendations for the prevention of stroke in patients with stroke and transient ischemic attack. *Stroke* 2008;39:1647–1652.
3. Hong KS, Lee JS. Statins in acute ischemic stroke: a systematic review. *J Stroke* 2015;17:282–301.
4. Biffi A, Devan WJ, Anderson CD, et al. Statin treatment and functional outcome after ischemic stroke. *Stroke* 2011;42:1314–1319.
5. Ni Chroinin D, Asplund K, Asberg S, et al. Statin therapy and outcome after ischemic stroke: systematic review and meta-analysis of observational studies and randomized trials. *Stroke* 2013;44:448–456.
6. Tsvigoulis G, Katsanos AH, Sharma VK, et al. Statin pretreatment is associated with better outcomes in large artery atherosclerotic stroke. *Neurology* 2016;86:1103–1111.
7. Marnane M, Merwick A, Sheehan OC, et al. Carotid plaque inflammation on 18F-fluorodeoxyglucose positron emission tomography predicts early stroke recurrence. *Ann Neurol* 2012;71:709–718.
8. Marnane M, Ni Chroinin D, Callaly E, et al. Stroke recurrence within the time window recommended for carotid endarterectomy. *Neurology* 2011;77:738–743.
9. Adams HP Jr, Bendixen BH, Kappelle LJ, et al. Classification of subtype of acute ischemic stroke: definitions for use in a multicenter clinical trial. TOAST. Trial of Org 10172 in Acute Stroke Treatment. *Stroke* 1993;24:35–41.
10. Tawakol A, Fayad ZA, Mogg R, et al. Intensification of statin therapy results in a rapid reduction in atherosclerotic inflammation: results of a multicenter fluorodeoxyglucosepositron emission tomography/computed tomography feasibility study. *J Am Coll Cardiol* 2013;62:909–917.
